# Supplementary material for: Sequencing of Seven Haloarchaeal Genomes Reveals Patterns of Genomic Flux
Source: PLoS One. 2012 Jul 24;7(7):e41389. doi: 10.1371/journal.pone.0041389 (PMC3404096; doi:10.1371/journal.pone.0041389)
Supplement: Table S1 — Primers for scaffold circularization experiment. Primer sequences for PCR-based test of scaffold completeness in Hfx. mediterranei. (XLSX) [file pone.0041389.s008.xlsx]

## Sheet: Sheet1
Supplementary Table 1: Primers for scaffold circularization experiment.
Scaffold	Forward Primer 5'--3'	Reverse Primer 5'--3'
Hfx. mediterranei 1	GATGCGGCGATGGTCGTAGA	CGGAGAATGTCCACGACTCGT
Hfx. mediterranei 2	GCGTGTTCACCCGAGTGCTG	GCCCACTCATTGCTCGCACGT
Hfx. mediterranei 3	GTGCTTTGGGCTGGGAAGAA	GGCTCGCTCTCCTGGTGGTT
Hfx. mediterranei 4	CGAGCCGTCTGTGACCGTCT	AGTGGCGGTAGCAGCGGTGT
Hfx. mediterranei 5	GGCGTCGAGTTCGGGACCAA	TCTGTACGCTCGCTCGGACA
