# Supplementary material for: Sequencing of Seven Haloarchaeal Genomes Reveals Patterns of Genomic Flux
Source: PLoS One. 2012 Jul 24;7(7):e41389. doi: 10.1371/journal.pone.0041389 (PMC3404096; doi:10.1371/journal.pone.0041389)
Supplement: Table S2 — COG enrichment. Percent CDSs assigned to COG groups in each species. Genera-wide means and P-values from Wilcoxon rank-sum test are shown. (XLSX) [file pone.0041389.s009.xlsx]

## Sheet: Sheet1
		Percent Protein Coding Genes in COG Functional Group per Species
Supplementary Table 2: COG enrichment.
Organism	Signal-Transduction (T)	Cell-cycle (D)	Amino acids (E)	Carbohydrates (G)	Inorganic ions (P)	Nucleotides (F)	Secondary metabolites (Q)	Translation (J)
Haloarcula marismortui	4.36994	0.901734	6.2659	3.23699	4.16185	1.71098	1.01734	3.79191
Haloarcula sinaiiensis	4.18687	1.05773	5.94976	3.4156	4.14279	1.67475	1.05773	3.72411
Haloarcula californiae	4.25762	0.972552	6.20272	2.89604	3.76054	1.64253	1.10223	3.63086
Haloarcula vallismortis	4.04016	0.905975	6.63565	3.64838	4.16259	1.86092	1.10186	4.11361
Haloferax denitrificans	3.22919	0.813862	8.66369	5.17196	4.56813	1.89026	1.28643	4.46311
Haloferax mediterranei	2.89193	0.735667	6.74784	3.7037	4.61695	1.97869	1.54744	4.43937
Haloferax mucosum	3.09696	0.81042	6.62808	3.90738	4.34153	2.08394	1.24457	4.97829
Haloferax sulfurifontis	3.3973	0.829875	8.22095	4.27905	4.56432	1.84129	1.34855	4.25311
Haloferax volcanii	2.76463	0.772105	8.3188	4.58281	4.55791	1.8929	1.34496	4.00996
Mean (Haloarcula spp.)	4.21365	0.959499	6.26351	3.29926	4.05694	1.7223	1.06979	3.81512
Mean (Haloferax spp.)	3.076	0.792386	7.71587	4.32898	4.52977	1.93742	1.35439	4.42877
Mean difference btw. genera	1.13764	0.167113	-1.45237	-1.02972	-0.472825	-0.215119	-0.284598	-0.613647
P-value	0.015873	0.015873	0.031746	0.015873	0.015873	0.031746	0.015873	0.031746
Note: P-values from Wilcoxon rank-sum test. P-values < 0.05 were interpreted as a significant difference between genera in terms of mean % CDSs dedicated to a function.
Note: Values represent % CDSs belonging to a COG group.
