# Supplementary material for: Sequencing of Seven Haloarchaeal Genomes Reveals Patterns of Genomic Flux
Source: PLoS One. 2012 Jul 24;7(7):e41389. doi: 10.1371/journal.pone.0041389 (PMC3404096; doi:10.1371/journal.pone.0041389)
Supplement: Table S3 — Comparison of COG functional group enrichment with study of Konstantinidis et al. [34] . P-values shown are from Wilcoxon rank-sum test. (XLSX) [file pone.0041389.s010.xlsx]

## Sheet: Sheet1
Supplementary Table 3: Comparison of COG functional group enrichment with study of Konstantinidis et al. [34]
COG functional category	Correlation with genome size. [34]	Differential enrichment btw Har and Hfx. (this study)	P-value (this study)
E: Amino acid transport and metabolism	None	Hfx > Har	0.032
G: Carbohydrate transport and metabolism	None	Hfx > Har	0.016
D: Cell cycle control, cell division, chromosome partitioning	-	Har > Hfx	0.016
N: Cell motility	+	X	0.29
M:Cell wall/membrane/envelope biogenesis	None	X	0.73
B: Chromatin structure and dynamics	N/A	X	0.56
H: Coenzyme transport and metabolism	None	X	0.41
V: Defense mechanisms	N/A	X	0.41
C: Energy production and conversion	+	X	0.19
S: Function unknown	None	X	0.11
R: General function prediction only	None	X	0.19
P: Inorganic ion transport and metabolism	None	Hfx > Har	0.016
U: Intracellular trafficking, secretion, and vesicular transport	None	X	0.29
I: Lipid transport and metabolism	None	X	0.19
F: Nucleotide transport and metabolism	-	Hfx > Har	0.032
O: Posttranslational modification, protein turnover, chaperones	None	X	0.73
L: Replication, recombination and repair	-	X	0.19
Q: Secondary metabolites biosynthesis, transport and catabolism	+	Hfx > Har	0.016
T: Signal transduction mechanisms	+	Har > Hfx	0.016
K: Transcription	+	X	0.29
J: Translation, ribosomal structure and biogenesis	-	Hfx > Har	0.032
Notes:
X = no significant difference
P-values for this study from two-way Wilcoxon rank-sum test.
None = No correlation found.
